# Supplementary material
Source: publisher figshare collection journal article supplement (https://rs.figshare.com/ndownloader/files/14050460)
Supplement: Supplementary file 1 [file 14050460]

## Sheet: Sheet1
Table S4: Groups defined for generating the decisive amino-acid dataset.
Group	Species
Blattellinae	Anallacta methanoides, Asiablatta kyotensis, Blattella germanica, Episymploce sundaica, Loboptera decipiens, Lobopterella dimidiatipes, Paratemnopteryx couloniana, Symploce sp., Ischnoptera deropeltiformis
Ectobiinae	Ectobius sylvestris
Nyctiborinae	Nyctibora sp.
Pseudophyllodromiinae	Balta vilis, Cariblatta sp., Ellipsidion sp., Euthlastoblatta diaphana, Sundablatta sexpunctata, Supella longipalpa
Blaberidae	Blaberus atropos, Diploptera punctata, Gyna lurida, Nauphoeta cinerea, Princisia vanwaerebecki, Panchlora nivea, Schultesia lampyridiformis
Blattidae	Catara rugosicollis, Deropeltis erythrocephala, Periplaneta americana, Shelfordella lateralis, Eurycotis floridana, Methana parva
Cryptocercidae	Cryptocercus wrighti
Isoptera	Incisitermes marginipennis, Mastotermes darwiniensis, Prorhinotermes simplex, Reticulitermes santonensis, Coptotermes sp., Zootermopsis nevadensis
Lamproblattidae	Lamproblatta albipalpus
Nocticolidae	Nocticola sp.
Polyphaginae	Ergaula capucina, Eucorydia yasumatsui, Polyphaga aegyptiaca, Therea bernhardti, Tivia sp.
Tryonicidae	Tryonicus parvus
Mantodea	Empusa pennata, Mantoida sp., Metallyticus splendidus
remaining Polyneoptera	Gratidia madagassa, Orestes mouhotii, Timema cristinae, Haploembia palaui, Antipaluria urichi, Mantophasma sp., Tanzaniophasma sp., Grylloblatta bifratrilecta, Galloisiana yuasai, Zorotypus caudelli, Aularches miliaris, Xya variegata, Nippancistroger testaceus, Phaeophilacris bredoides, Diplatys sp., Forficula auricularia, Cosmioperla kuna, Protonemura ausonia
